# Supplementary material
Source: Copernicus journal article supplement (doi:10.5194/egusphere-2026-832)
Supplement: Supplementary file 1 [file egusphere-2026-832-supplement.pdf]

# Supplementary material to “Atmospheric geopotentials from ERA5 linked to the daily maximum temperature record-breaking in Spain (1960–2023)”

Elsa Barrio-Torres<sup>1</sup>, Jesús Abaurrea<sup>1</sup>, Jesús Asín<sup>1</sup>, Jorge Castillo-Mateo<sup>1</sup>, Ana Carmen Cebrián<sup>1</sup>, and Zeus Gracia-Tabuenca<sup>1</sup>

<sup>1</sup>Department of Statistical Methods, University of Zaragoza, Pedro Cerbuna 12, 50009 Zaragoza, Spain

**Correspondence:** Elsa Barrio-Torres (e.barrio@unizar.es)

## S.1 Extended Exploratory data analysis

### S.1.1 Time trends of atmospheric variables

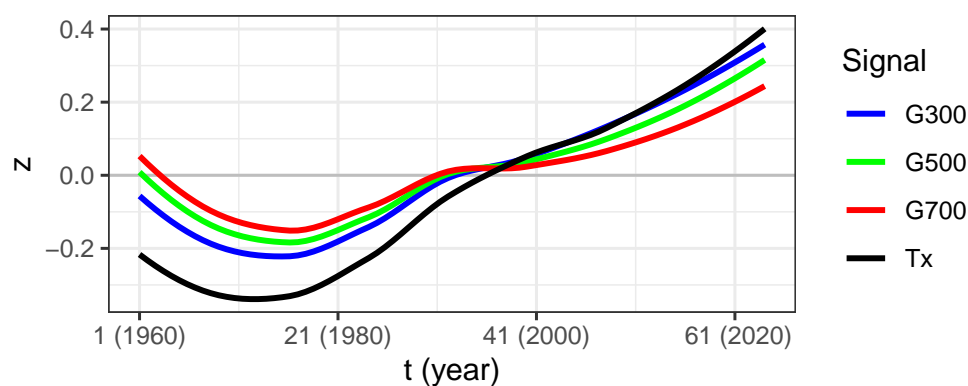

**Figure S.1.** LOESS curves of the spatial averages of the standardized  $T_x$  and geopotential variable series.

## S.1.2 Correlations of atmospheric variables

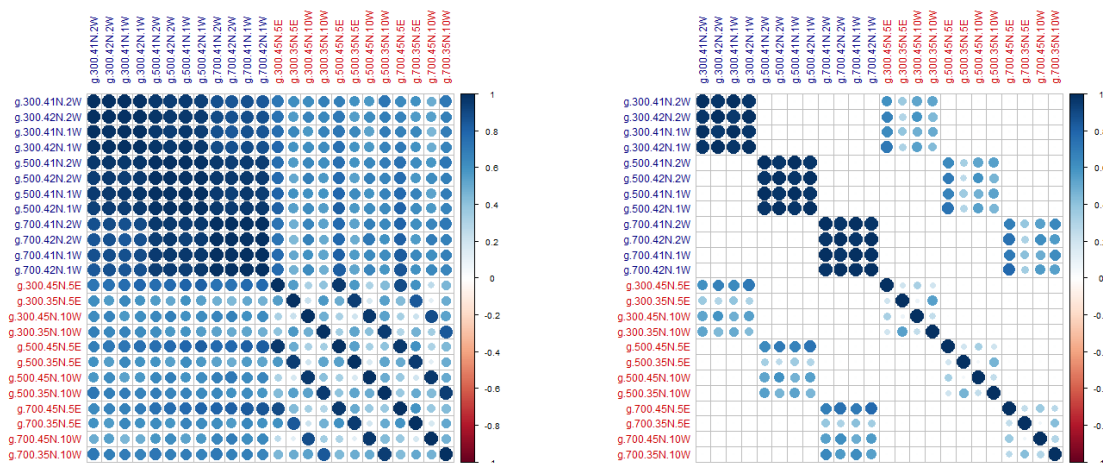

**Figure S.2.** Pearson's (left) and intra-class (right) cross-correlation plots of the geopotential altitude covariates at the three pressure levels in the four nearest and furthest grid points of Zaragoza station (41N, 1W).

## S.1.3 Boxplots of geopotential series conditioned on the occurrence or absence of record and geographical zone.

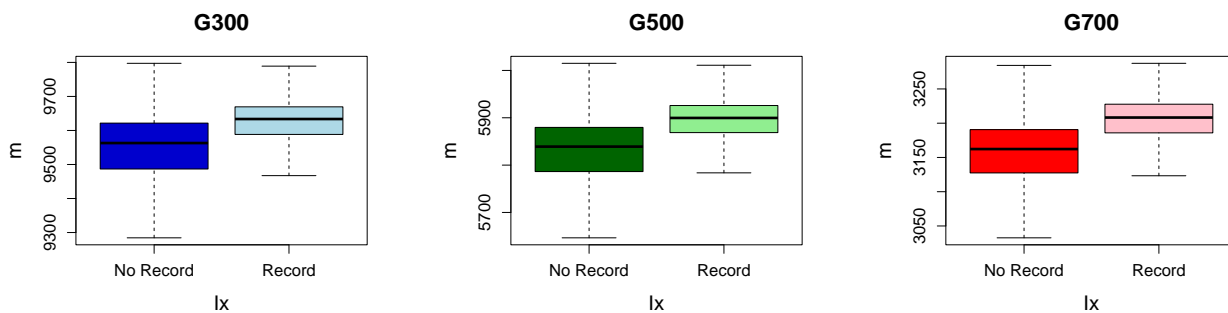

**Figure S.3.** Boxplots of geopotential variables at the 300, 500, and 700 hPa pressure levels (in geopotential meters) during the period 1984–2023, conditioned on the occurrence or non-occurrence of  $T_x$  records.

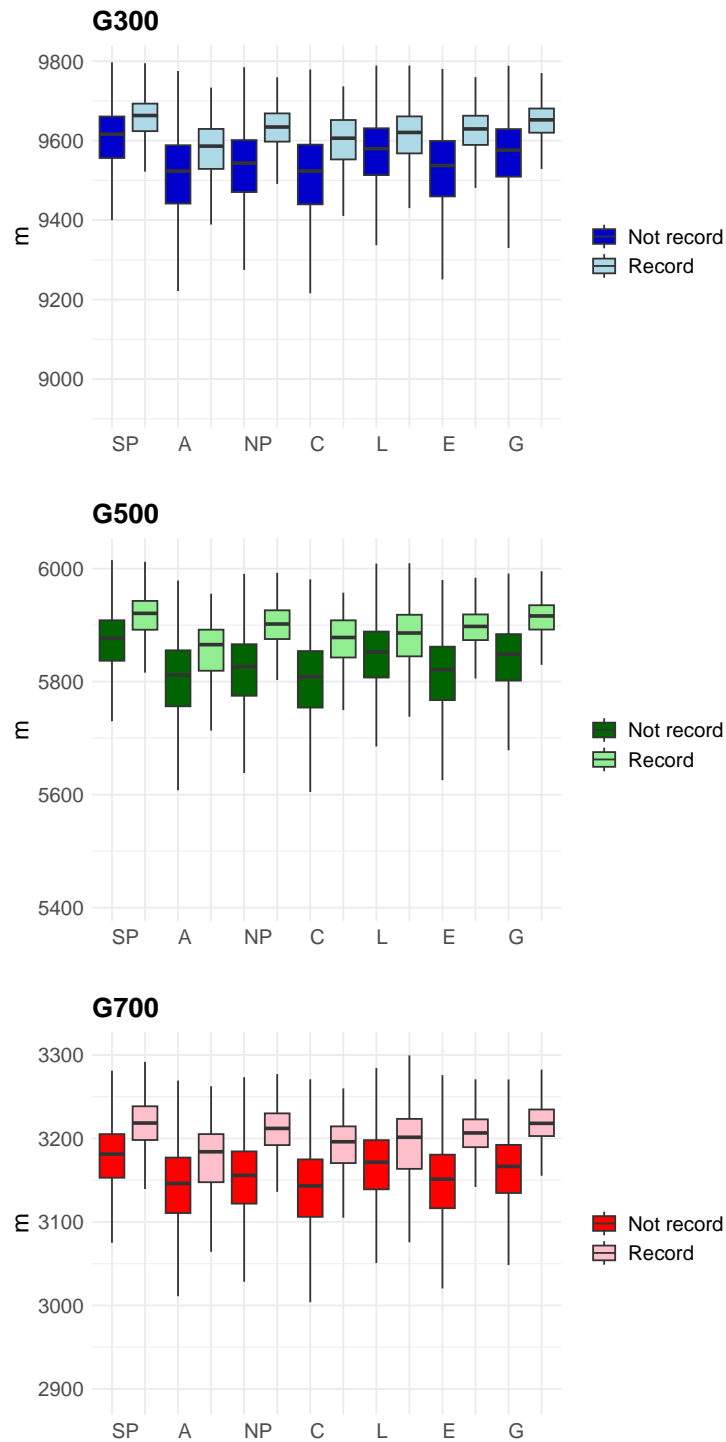

**Figure S.4.** Boxplots of geopotential series at pressure levels of 300, 500, and 700 hPa in the reference period 1984–2023 conditioned on occurrence or absence of  $T_x$  record and to the geographical region (A: Andalusia, C: Cantabrian coast, E: Ebro valley, G: Galicia, L: Levante, NP: North Plateau, and SP: South Plateau).

## 5 S.2 Extended Modeling Results

### S.2.1 Local models

**Table S.1.** Number of parameters ( $k$ ) and performance metrics ( $AUC$ ,  $AIC$ ) for each local model corresponding to each station.  $AIC$  was computed in the training period (1960–2010) and the  $AUC$  in the test period (2011–2023). Stations are sorted by distance to the coast in ascending order.

| Station           | $k$ | $AUC$ | $AIC$ |
|-------------------|-----|-------|-------|
| Santander         | 20  | 0.89  | 2033  |
| San Sebastián     | 17  | 0.92  | 1881  |
| Almería           | 21  | 0.87  | 2325  |
| A Coruña          | 25  | 0.82  | 2041  |
| Barcelona-Airport | 28  | 0.84  | 2352  |
| Málaga            | 27  | 0.89  | 1961  |
| Gijón             | 16  | 0.67  | 2160  |
| Huelva            | 22  | 0.90  | 1873  |
| Valencia          | 25  | 0.86  | 2227  |
| Reus              | 21  | 0.81  | 2208  |
| Castellón         | 29  | 0.86  | 2564  |
| Barcelona-Fabra   | 20  | 0.86  | 2365  |
| Bilbao            | 18  | 0.92  | 1967  |
| Tortosa           | 22  | 0.83  | 2679  |
| Santiago          | 15  | 0.93  | 1962  |
| Murcia            | 26  | 0.89  | 1914  |
| Vitoria           | 25  | 0.95  | 1871  |
| Moron             | 19  | 0.95  | 1902  |
| Sevilla           | 27  | 0.93  | 1711  |
| Lleida            | 22  | 0.91  | 1976  |
| Logroño           | 26  | 0.93  | 1950  |
| León              | 23  | 0.94  | 1791  |
| Ponferrada        | 15  | 0.95  | 1803  |
| Burgos            | 22  | 0.96  | 2011  |
| Albacete          | 17  | 0.92  | 1878  |
| Badajoz           | 20  | 0.94  | 1971  |
| Soria             | 34  | 0.94  | 1748  |
| Daroca            | 23  | 0.94  | 1859  |
| Zaragoza          | 28  | 0.90  | 2001  |
| Valladolid        | 22  | 0.96  | 1812  |
| Cáceres           | 29  | 0.95  | 1790  |
| Zamora            | 23  | 0.95  | 1871  |
| Ciudad Real       | 34  | 0.96  | 1763  |
| Salamanca         | 25  | 0.94  | 1820  |
| Navacerrada       | 26  | 0.95  | 1946  |
| Madrid            | 27  | 0.94  | 1998  |

**Table S.2.** Number of surviving covariates with different restrictions.

|             | $s_t = 1/4(9)$ | $s_t = 1/3(12)$ | $s_t = 1/2(18)$ |
|-------------|----------------|-----------------|-----------------|
| $z_t = 1.6$ | 37             | 30              | 19              |
| $z_t = 2$   | 31             | 23              | 15              |
| $z_t = 2.6$ | 19             | 16              | 8               |
| $z_t = 3.2$ | 12             | 6               | 4               |

**S.2.2 Summary of global model M1)**

|                       | Estimate  | Std. Error | z value | Pr(> z ) |
|-----------------------|-----------|------------|---------|----------|
| (Intercept)           | -133.5485 | 8.6343     | -15.47  | 0.0000   |
| g700.                 | 0.0011    | 0.0001     | 21.99   | 0.0000   |
| g700.45N.10W          | -0.0014   | 0.0001     | -20.67  | 0.0000   |
| poly(g300.35N.5E, 2)1 | -181.7786 | 16.7657    | -10.84  | 0.0000   |
| poly(g300.35N.5E, 2)2 | 130.1354  | 5.3892     | 24.15   | 0.0000   |
| g700..lag1            | 0.0018    | 0.0001     | 20.47   | 0.0000   |
| g300.35N.10W.lag1     | -0.0002   | 0.0000     | -9.77   | 0.0000   |
| poly(g700.35N.5E, 2)1 | -31.4230  | 18.1093    | -1.74   | 0.0827   |
| poly(g700.35N.5E, 2)2 | -135.7835 | 6.8580     | -19.80  | 0.0000   |
| g500.45N.10W          | 0.0007    | 0.0000     | 14.39   | 0.0000   |
| g300.35N.10W          | -0.0010   | 0.0000     | -23.53  | 0.0000   |
| poly(g700.45N.5E, 2)1 | -367.4691 | 18.1819    | -20.21  | 0.0000   |
| poly(g700.45N.5E, 2)2 | 79.7605   | 4.0654     | 19.62   | 0.0000   |
| g500.45N.5E           | 0.0012    | 0.0001     | 20.68   | 0.0000   |
| g300.35N.5E.lag1      | -0.0004   | 0.0000     | -12.66  | 0.0000   |
| g500.35N.10W          | 0.0016    | 0.0001     | 24.73   | 0.0000   |
| g500..lag1            | -0.0007   | 0.0001     | -11.71  | 0.0000   |
| g500.35N.5E           | 0.0014    | 0.0001     | 9.96    | 0.0000   |

As a complement, Figure S.5 in the Supplementary material summarizes the z-scores of the predictors included in the final local models.

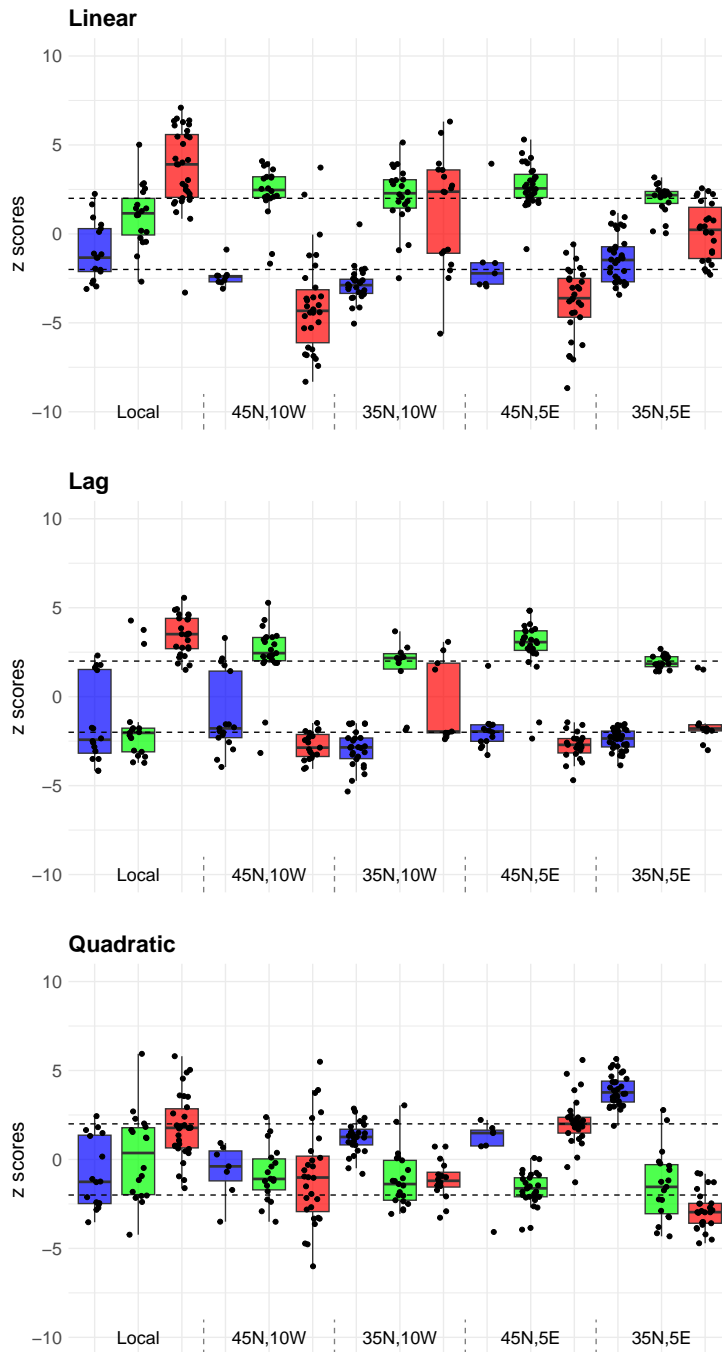

**Figure S.5.** Jittered boxplot of the z-scores of the estimated coefficients from the optimal local models. Color indicates pressure level in hPa: 300 (blue), 500 (green), 700 (red).  $x$ -axis indicates the five grid points: nearest (Local), north-west (45N.10W), south-west (35N.10W), north-east (45N.5E), south-east (35N.5E). Covariates: linear terms (top), 1-lagged terms (middle), quadratic terms (bottom). Two horizontal lines are shown at  $y = 2$  and  $y = -2$ .

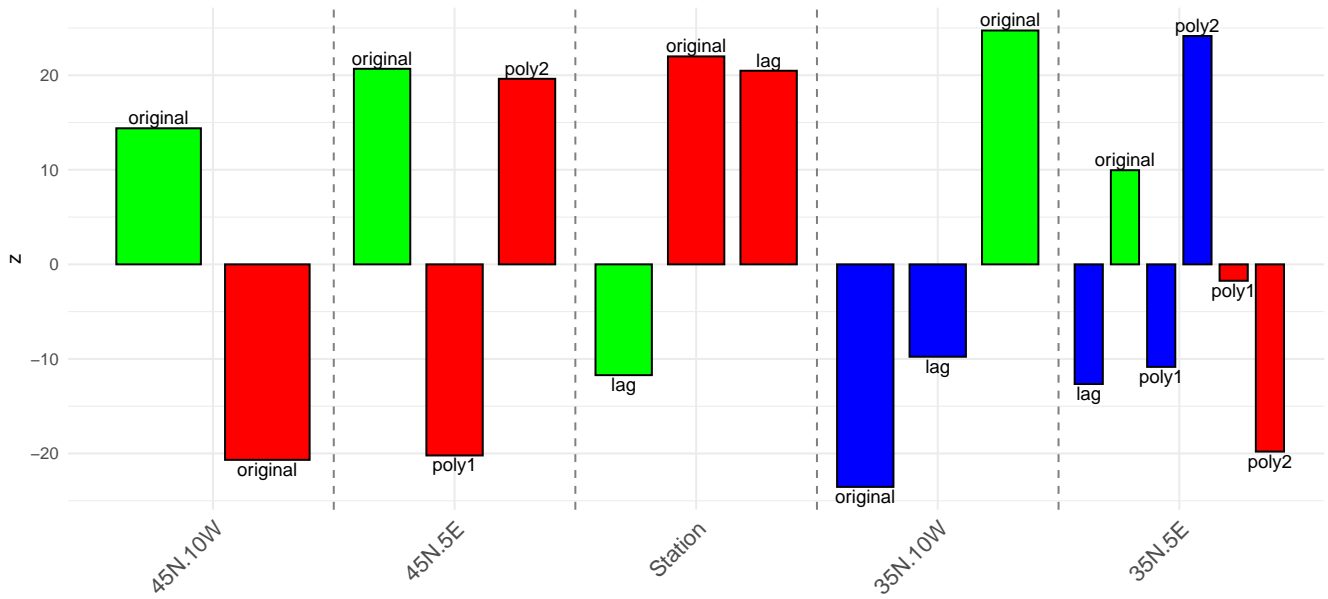

**Figure S.6.** Diagram with the 14 geopotential variables retained in M1 model. Variables followed by ‘lag’ represent one-day lagged terms, while those preceded by ‘poly’ correspond to the second-order polynomial of the corresponding variable. Top: pseudo-geographical representation of the four corners of the grid and the nearest point to a station. Bottom: standardized estimated coefficients (z-scores) of the model. Blue color is associated to 300 hPa, green to 500 hPa, and red to 700 hPa.

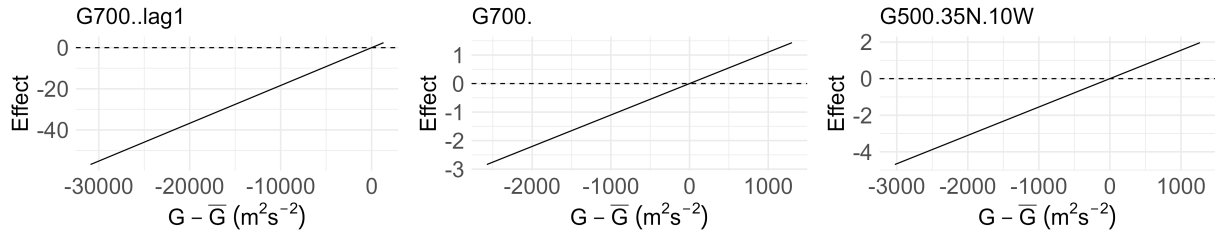

**Figure S.7.** Partial effects of the 700 hPa (column) and 500 hPa (35N.10W) predictors from the M1 model. The  $y$ -axis shows each variable multiplied by its corresponding regression coefficient and centered around the mean. The  $x$ -axis shows the observed values of each predictor centered around the mean.

10 S.2.3 Summary of atmospheric-geodetic model (M2)

|                           | Estimate   | Std. Error | z value | Pr(> z ) |
|---------------------------|------------|------------|---------|----------|
| (Intercept)               | -485.3693  | 58.6888    | -8.27   | 0.0000   |
| g700.                     | 0.0020     | 0.0001     | 22.20   | 0.0000   |
| g700.45N.10W              | 0.0187     | 0.0014     | 13.61   | 0.0000   |
| LAT                       | 7.8238     | 1.4230     | 5.50    | 0.0000   |
| poly(g300.35N.5E, 2)1     | -204.4119  | 16.9461    | -12.06  | 0.0000   |
| poly(g300.35N.5E, 2)2     | 127.3015   | 5.4687     | 23.28   | 0.0000   |
| g700..lag1                | 0.0019     | 0.0001     | 16.21   | 0.0000   |
| g300.35N.10W.lag1         | -0.0002    | 0.0000     | -10.37  | 0.0000   |
| poly(g700.35N.5E, 2)1     | -61.6837   | 18.6022    | -3.32   | 0.0009   |
| poly(g700.35N.5E, 2)2     | -128.0573  | 6.9334     | -18.47  | 0.0000   |
| poly(g700.45N.5E, 2)1     | -3371.5517 | 334.9217   | -10.07  | 0.0000   |
| poly(g700.45N.5E, 2)2     | -147.7684  | 78.3932    | -1.88   | 0.0594   |
| g500.45N.5E               | 0.0054     | 0.0011     | 4.79    | 0.0000   |
| g300.35N.5E.lag1          | -0.0003    | 0.0000     | -10.57  | 0.0000   |
| g500.35N.5E               | -0.0022    | 0.0005     | -4.25   | 0.0000   |
| g300.35N.10W              | -0.0007    | 0.0000     | -15.21  | 0.0000   |
| g500.45N.10W              | -0.0049    | 0.0010     | -5.07   | 0.0000   |
| g500.35N.10W              | 0.0011     | 0.0001     | 16.32   | 0.0000   |
| LON                       | -9.3112    | 1.0743     | -8.67   | 0.0000   |
| g700.45N.10W.lag1         | -0.0006    | 0.0001     | -7.17   | 0.0000   |
| g500..lag1                | -0.0008    | 0.0001     | -10.83  | 0.0000   |
| g500.45N.10W.lag1         | -0.0034    | 0.0004     | -8.18   | 0.0000   |
| g500.45N.5E.lag1          | 0.0037     | 0.0004     | 9.08    | 0.0000   |
| g700.45N.5E.lag1          | -0.0003    | 0.0001     | -2.62   | 0.0089   |
| g700.45N.10W:LAT          | -0.0005    | 0.0000     | -14.21  | 0.0000   |
| LAT:poly(g700.45N.5E, 2)1 | 69.1298    | 8.1977     | 8.43    | 0.0000   |
| LAT:poly(g700.45N.5E, 2)2 | 5.6440     | 1.9189     | 2.94    | 0.0033   |
| LAT:g500.45N.10W          | 0.0001     | 0.0000     | 5.25    | 0.0000   |
| poly(g700.45N.5E, 2)1:LON | -73.6749   | 6.3212     | -11.66  | 0.0000   |
| poly(g700.45N.5E, 2)2:LON | 5.9789     | 1.3493     | 4.43    | 0.0000   |
| g300.35N.10W:LON          | 0.0000     | 0.0000     | 7.29    | 0.0000   |
| g700.:LON                 | -0.0001    | 0.0000     | -9.99   | 0.0000   |
| g700.45N.10W:LON          | 0.0002     | 0.0000     | 9.05    | 0.0000   |
| LON:g500.45N.10W.lag1     | -0.0001    | 0.0000     | -9.38   | 0.0000   |
| LAT:g500.45N.10W.lag1     | 0.0001     | 0.0000     | 8.81    | 0.0000   |
| g500.45N.5E:LON           | 0.0001     | 0.0000     | 6.75    | 0.0000   |
| LAT:g500.35N.5E           | 0.0001     | 0.0000     | 7.25    | 0.0000   |
| LAT:g500.45N.5E           | -0.0001    | 0.0000     | -3.79   | 0.0002   |
| LON:g700.45N.5E.lag1      | 0.0001     | 0.0000     | 12.22   | 0.0000   |
| LAT:g500.45N.5E.lag1      | -0.0001    | 0.0000     | -7.76   | 0.0000   |
| g500.45N.10W:LON          | -0.0001    | 0.0000     | -4.25   | 0.0000   |

## S.2.4 Alternative global model

**Table S.3.** Similar to Table 2, but for the alternative model to M1.

| Model       | $k_{coeff}$ | $n_v$ | AIC     | AUC  | $AUC_I$ | $AUC_C$ | $Min_C$ | $Q50_C$ | $Q10\Delta$ |
|-------------|-------------|-------|---------|------|---------|---------|---------|---------|-------------|
| <b>m1</b>   | 18          | 15    | 97808.4 | 0.86 | 0.91    | 0.78    | 0.59    | 0.79    | 0.22        |
| <b>Step</b> | 18          | 12    | 98337.7 | 0.84 | 0.90    | 0.75    | 0.56    | 0.77    | 0.26        |

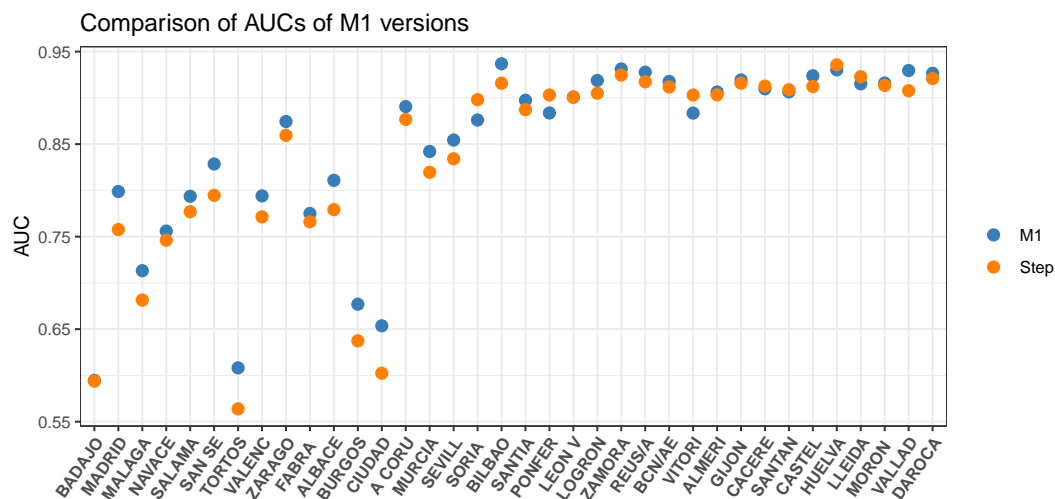

**Figure S.8.** Comparison of AUC values across stations for M1 and Step. M1 is a global model that includes only geopotential variables identified during Step 2 of the modeling algorithm. Step is an unsupervised model constructed by skipping Step 2.

## S.2.5 State of the atmosphere

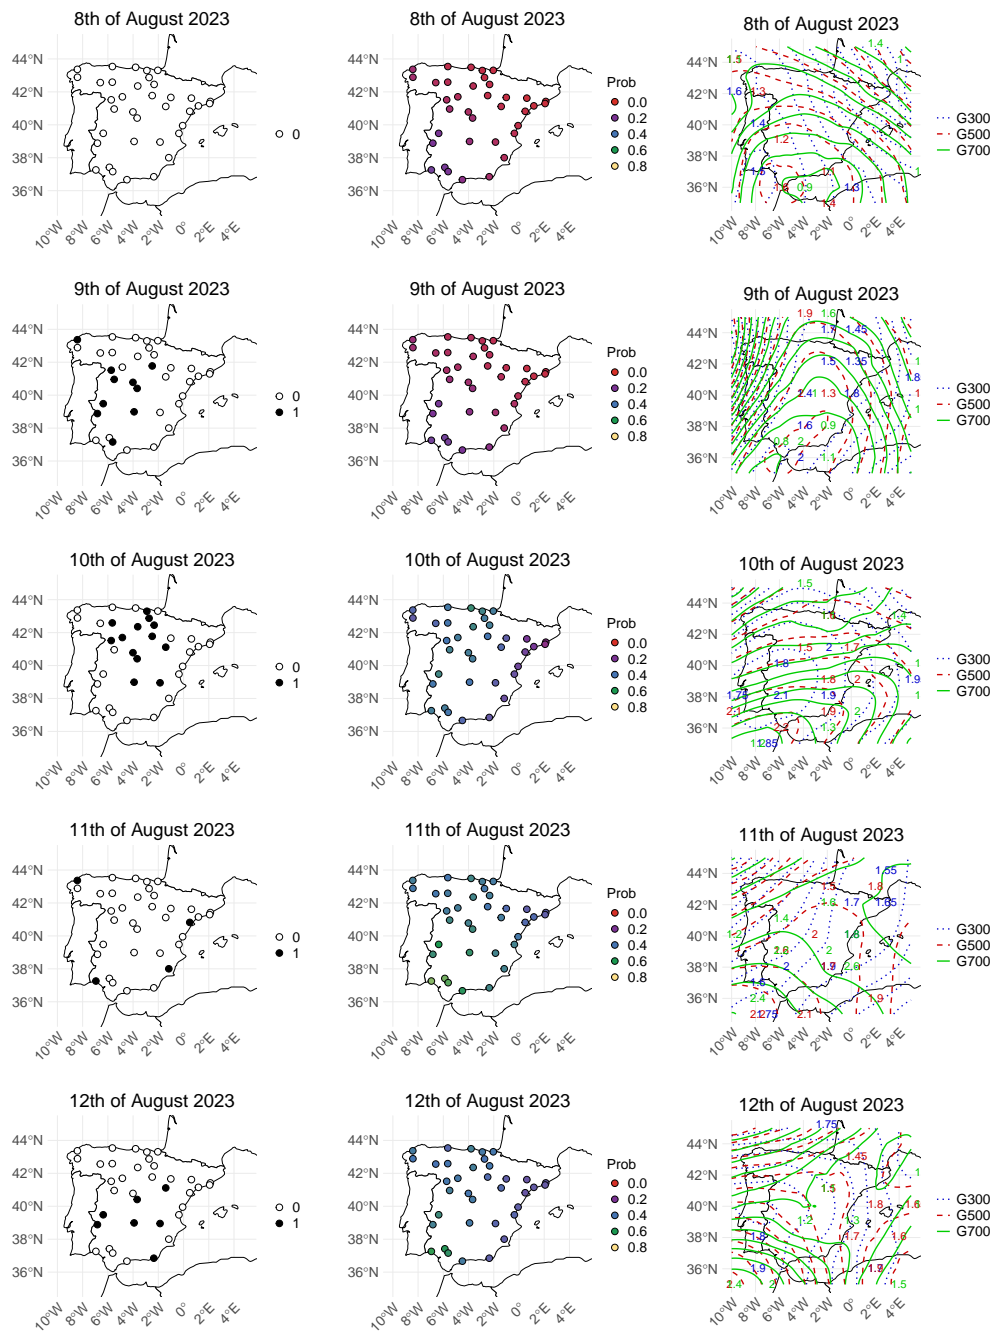

**Figure S.9.** Each row corresponds to a day of the heatwave from 08–12 August 2023 (validation period). Left column: indicates whether each station experienced a record (black points = records, white points = no record). Middle column: shows the record probability predicted by model M2 at each station. Right column: displays geopotential composites for the specific day at pressure levels of 300 hPa, 500 hPa, and 700 hPa.

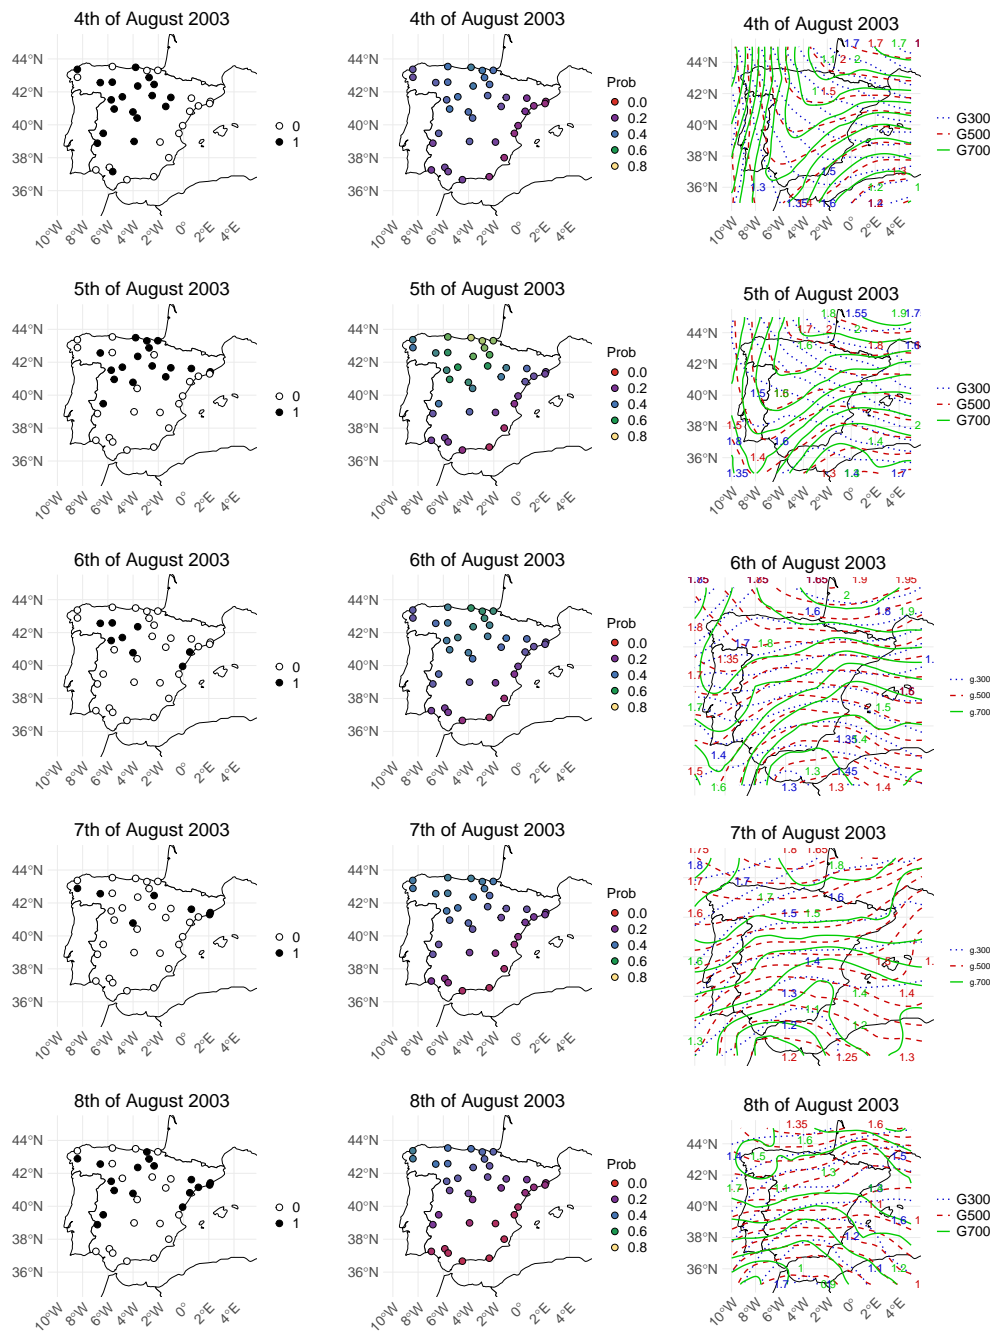

**Figure S.10.** Each row corresponds to a day of the heatwave from 04–08 August 2003 (training period). Left column: indicates whether each station experienced a record (black points = records, white points = no record). Middle column: shows the record probability predicted by model M2 at each station. Right column: displays geopotential composites for the specific day at pressure levels of 300 hPa, 500 hPa, and 700 hPa.

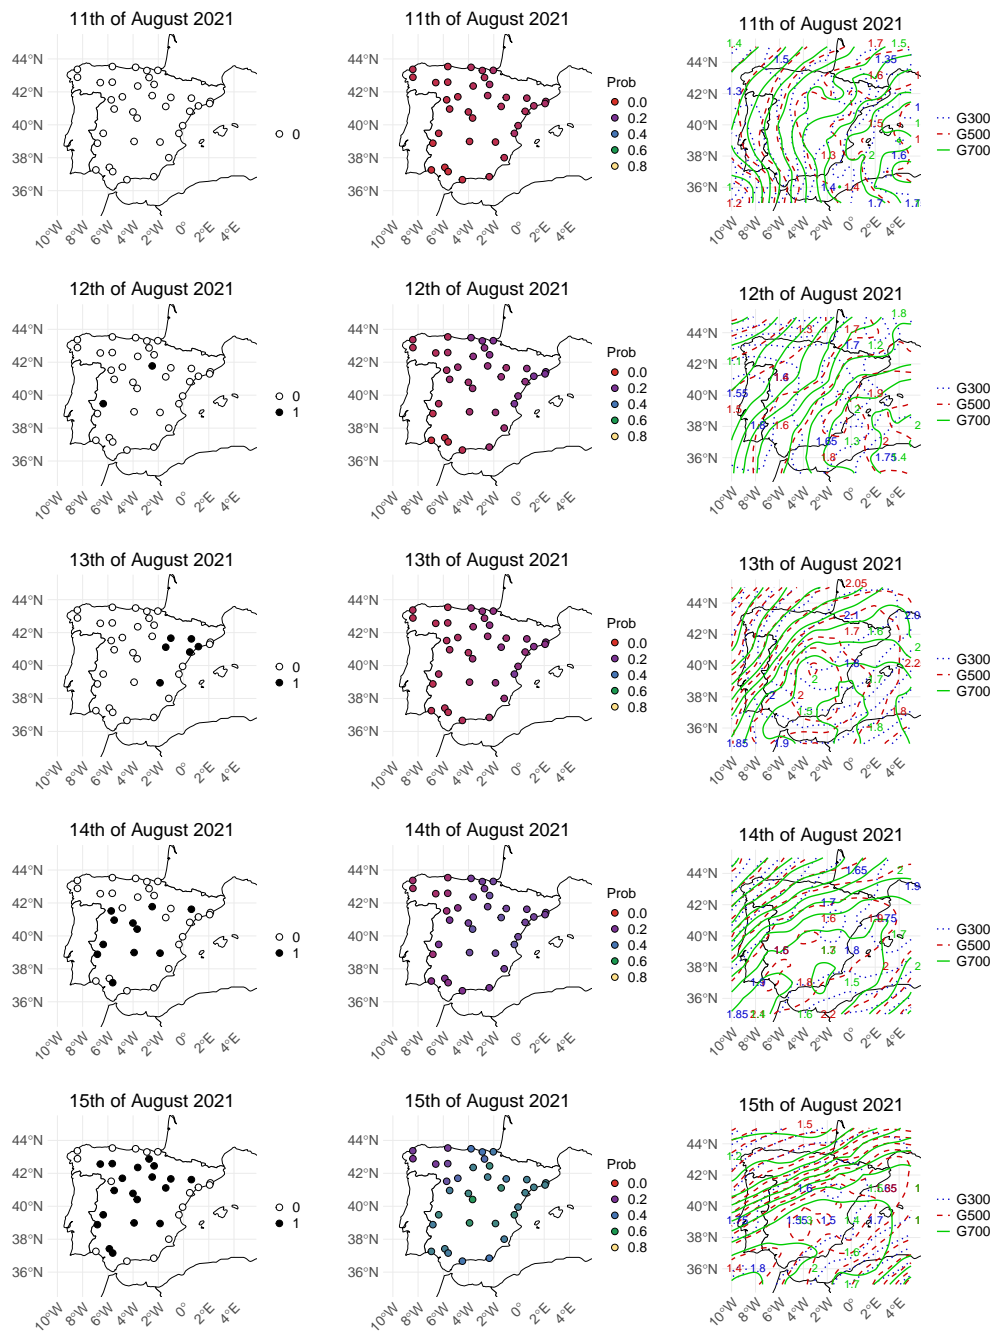

**Figure S.11.** Each row corresponds to a day of the heatwave from 11–15 August 2021 (training period). Left column: indicates whether each station experienced a record (black points = records, white points = no record). Middle column: shows the record probability predicted by model M2 at each station. Right column: displays geopotential composites for the specific day at pressure levels of 300 hPa, 500 hPa, and 700 hPa.
